# Supplementary material for: A local human Vδ1 T cell population is associated with survival in nonsmall-cell lung cancer
Source: PubMed Central journal article supplement (PMC9236901; doi:10.1038/s43018-022-00376-z), 2022-05-30
Supplement: 43018_2022_376_MOESM1_ESM.pdf [file 43018_2022_376_MOESM1_ESM.pdf]

**Supplementary information**

---

**A local human V $\delta$ 1 T cell population is associated with survival in nonsmall-cell lung cancer**

---

In the format provided by the authors and unedited

| Patient ID | Age | Sex | Smoking Status | Histology      | Primary Size (mm) | Stage | Relapse | RFS (days) |
|------------|-----|-----|----------------|----------------|-------------------|-------|---------|------------|
| CRUK0001   | 84  | M   | Ex-smoker      | Adenocarcinoma | 25                | 2A    | N       | 1120       |
| CRUK0058   | 74  | M   | Ex-smoker      | Adenocarcinoma | 16                | 2B    | N       | 1872       |
| CRUK0107   | 64  | M   | Ex-smoker      | Squamous       | 80                | 2B    | N       | 1862       |
| CRUK0124^  | 78  | M   | Ex-smoker      | Adenocarcinoma | 35                | 2B    | N       | 1544       |
| CRUK0173   | 62  | F   | Ex-smoker      | Squamous       | 40                | 3A    | Y       | 812        |
| CRUK0178   | 59  | M   | Ex-smoker      | Adenocarcinoma | 20                | 2A    | N       | 66         |
| CRUK0193   | 74  | M   | Never-smoker   | Adenocarcinoma | 26                | 1A    | N       | 2107       |
| CRUK0214   | 67  | M   | Smoker         | Squamous       | 23                | 1B    | N       | 833        |
| CRUK0218   | 53  | F   | Smoker         | Adenocarcinoma | 34                | 1B    | N       | 1291       |
| CRUK0230#  | 53  | F   | Ex-smoker      | Adenocarcinoma | 55                | 2A    | NA      | NA         |
| CRUK0271#  | 57  | F   | Smoker         | Adenosquamous  | 59                | 2B    | NA      | NA         |
| CRUK0272   | 92  | M   | Ex-smoker      | Adenocarcinoma | 55                | 2A    | Y       | 95         |
| CRUK0291#  | 62  | M   | Smoker         | Squamous       | 50                | 3A    | NA      | NA         |
| CRUK0299   | 49  | F   | Smoker         | Adenocarcinoma | 25                | 2A    | Y       | 640        |
| CRUK0324^  | 62  | M   | Smoker         | Adenocarcinoma | 29                | 1A    | N       | 1886       |
| CRUK0329   | 69  | M   | Ex-smoker      | Squamous       | 30                | 1A    | Y       | 703        |
| CRUK0371^  | 87  | M   | Ex-smoker      | Adenocarcinoma | 18                | 1B    | N       | 1429       |
| CRUK0381^  | 52  | F   | Ex-smoker      | Squamous       | 55                | 2A    | N       | 1943       |
| CRUK0412   | 50  | M   | Ex-smoker      | Adenocarcinoma | 75                | 3A    | Y       | 280        |
| CRUK0416   | 70  | M   | Ex-smoker      | Adenocarcinoma | 32                | 2A    | N       | 99         |
| CRUK0516*  | 60  | M   | Smoker         | Squamous       | 73                | 2B    | Y       | 59         |
| CRUK0549^  | 64  | F   | Ex-smoker      | Squamous       | 75                | 2B    | N       | 1546       |
| CRUK0696   | 60  | F   | Smoker         | Adenocarcinoma | 35                | 1B    | N       | 1702       |
| CRUK0817*  | 64  | M   | Ex-smoker      | Adenocarcinoma | 130               | 2B    | Y       | 203        |
| CRUK0867   | 60  | M   | Smoker         | Squamous       | 44                | 2A    | Y       | 131        |

### Supplementary Table 1

Clinical features of patients. Cryopreserved PBMCs, NT tissue and tumour TILs were characterised by flow cytometry +/- TCRseq. ^Contemporaneous PBMC phenotyping not performed for these samples. #Involved margins on primary resection and thus excluded from outcome analysis. \*Flow cytometry staining failed on TILs from CRUK516 NT tissue and CRUK817 tumour. "Ex-smoker" = stopped smoking for >12 months, "Smoker" = currently smoking or stopped smoking for <12 months. RFS: relapse-free survival.

| Key Reagents                     | Supplier        | Catalogue Number | Dilution Used |
|----------------------------------|-----------------|------------------|---------------|
| Anti-CD3 (PerCP-Cy5.5)           | Biolegend       | 317336           | 1:100         |
| Anti-CD4 (PE-Dazzle594)          | Biolegend       | 317448           | 1:100         |
| Anti-CD8a (AF700)                | Biolegend       | 300920           | 1:100         |
| Anti-CD14 (PE-Cy7)               | Biolegend       | 367112           | 1:100         |
| Anti-CD19 (AF700)                | Biolegend       | 363033           | 1:100         |
| Anti-CD25 (BV650)                | Biolegend       | 302634           | 1:100         |
| Anti-CD27 (BV786)                | BD Biosciences  | 563327           | 1:100         |
| Anti-CD45 (BV605)                | Biolegend       | 304042           | 1:100         |
| Anti-CD45RA (BV510)              | Biolegend       | 304142           | 1:100         |
| Anti-CD56 (APC)                  | Biolegend       | 362504           | 1:100         |
| Anti-CD103 (BV421)               | Biolegend       | 350214           | 1:100         |
| Anti-CD107A (BV650)              | Biolegend       | 328637           | 1:100         |
| Anti-IL-17 (APC)                 | Biolegend       | 512333           | 1:100         |
| Anti-IFN- $\gamma$ (BV421)       | Biolegend       | 502531           | 1:100         |
| Anti-TCR V $\delta$ 1 (FITC)     | ThermoFisher    | TCR2730          | 1:100         |
| Anti-TCR V $\delta$ 2 (PE)       | Biolegend       | 331408           | 1:100         |
| Anti-TCR $\gamma\delta$ (PE-Cy7) | Beckman Coulter | B10247           | 1:100         |
| BD CellFIX                       | BD Biosciences  | 340181           | 1x            |
| Brefeldin A                      | Biolegend       | 420601           | 5 $\mu$ g/ml  |
| DNase                            | Roche           | 10104159001      | 75 $\mu$ g/mL |
| Permeabilisation Wash Buffer     | Biolegend       | 421002           | 1x            |
| Superase RNase Inhibitor         | ThermoFisher    | AM2694           | 2U/ml         |
| Type 1 Collagenase               | ThermoFisher    | 17018029         | 10U/ml        |
| Zombie NIR Viability Dye         | Biolegend       | 423106           | 1:500         |

### Supplementary Table 2

Key reagents and antibodies.
